# Supplementary material for: Convenient synthesis of EDOT-based dyes by CH-activation and their application as dyes in dye-sensitized solar cells
Source: Royal Society of Chemistry journal article supplement (doi:10.1039/c6ta04483b), 2016-01-01

### ELECTRONIC SUPPLEMENTARY INFORMATION

#### Convenient synthesis of EDOT based dyes by CH-activation and their testing in dye-sensitized solar cells

S. M. Abdalhadi,<sup>a</sup> A. Connell,<sup>b</sup> X. Zhang,<sup>a</sup> A. A. Wiles,<sup>a</sup> M. L. Davies,<sup>c</sup> P. J. Holliman<sup>b\*</sup> and G. Cooke<sup>a\*</sup>

<sup>a</sup> Glasgow Centre for Physical Organic Chemistry (GCPOC), WestCHEM, School of Chemistry, University of Glasgow, Glasgow, G12 8QQ, U.K.

<sup>b</sup> School of Chemistry, Bangor University, Bangor, Gwynedd, LL57 2UW, U.K.

<sup>c</sup> SPECIFIC, Swansea University, Swansea, SA1 8EN, U.K.

\*Correspondence - graeme.cooke@glasgow.ac.uk

#### 1. Synthesis:

**Table S1.** One-pot C-H activation method development for the synthesis of compound **4a**.

| EDOT | Bz     | DMA    | Ligand                                         | Solvent | Time   | Yield            |
|------|--------|--------|------------------------------------------------|---------|--------|------------------|
| 1 eq | 1.2 eq | 1.2 eq | PH(Cy) <sub>3</sub> .BF <sub>4</sub>           | DMF     | 24 hrs | 27% <sup>1</sup> |
| 2 eq | 1 eq   | 1.5 eq | PH(Cy) <sub>3</sub> .BF <sub>4</sub>           | DMF     | 42 hrs | 4% <sup>2</sup>  |
| 2 eq | 1 eq   | 1.5 eq | PH(Cy) <sub>3</sub> .BF <sub>4</sub>           | THF     | 42 hrs | --- <sup>2</sup> |
| 2 eq | 1.5 eq | 1 eq   | PH(Cy) <sub>3</sub> .BF <sub>4</sub>           | DMF     | 42 hrs | 43% <sup>3</sup> |
| 2 eq | 1.5 eq | 1 eq   | PH(Cy) <sub>3</sub> .BF <sub>4</sub>           | THF     | 42 hrs | 14% <sup>3</sup> |
| 2 eq | 2 eq   | 1 eq   | PH( <i>i</i> Pr) <sub>3</sub> .BF <sub>4</sub> | DMF     | 42 hrs | 51% <sup>3</sup> |
| 2 eq | 2 eq   | 1 eq   | PH( <i>t</i> Bu) <sub>3</sub> .BF <sub>4</sub> | DMF     | 42 hrs | 58% <sup>3</sup> |

Bz: 4-Bromobenzaldehyde; DMA: 4-bromo-*N,N*-dimethylaniline; PivOH: pivalic acid; DMF: Dimethylformamide; THF: Tetrahydrofuran

All reactions were undertaken in an oven-dried flask flushed with Argon.

<sup>1</sup>EDOT, Bz, DMA, Cs<sub>2</sub>CO<sub>3</sub> (1.5 eq), PivOH (0.3 eq), Pd(OAc)<sub>2</sub> (10%), ligand (30%) were dissolved in the solvent and left to stir for 24 hrs at 100°C.

<sup>2</sup>Bz, EDOT, Cs<sub>2</sub>CO<sub>3</sub> (2.5 eq), PivOH (40%), Pd(OAc)<sub>2</sub> (5%), ligand (15%) were dissolved in the solvent and initially left to react for 18 hrs. DMA was then added with Pd(OAc)<sub>2</sub> (5%) and ligand (15%) and the reaction was left to stir for 24 hrs at 100°C.

<sup>3</sup>DMA, EDOT, Cs<sub>2</sub>CO<sub>3</sub> (2.5 eq), PivOH (40%), Pd(OAc)<sub>2</sub> (5%), ligand (15%) were dissolved in the solvent and initially left to react for 18 hrs. Bz was then added with Pd(OAc)<sub>2</sub> (5%) and ligand (15%) and the reaction was left to stir for 24 hrs at 100°C.

## 2. Electrochemistry:

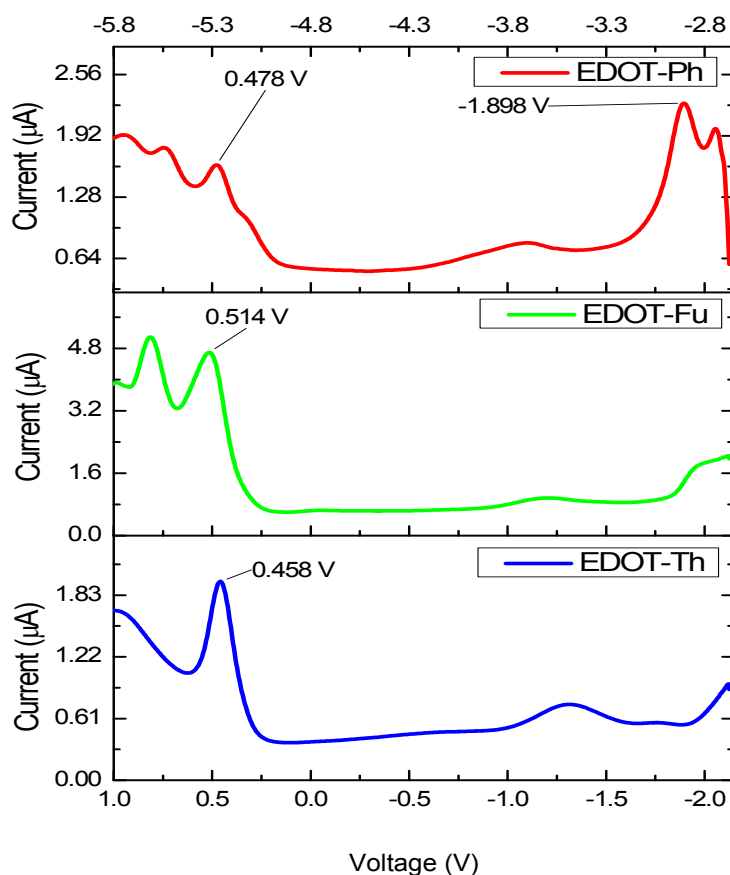

**Fig. S1** Square-wave voltammograms of the dyes ( $1 \times 10^{-5}$  M) recorded in DMF (V vs.  $\text{Fc}/\text{Fc}^+$ ).

## 3. Device manufacture and testing:

$\text{TiO}_2$  photo-anodes (0.5 x 2 cm) were prepared on TEC7™ FTO glass (NSG) by doctor blading 2 layers of DSL18NR-T colloid (Dyesol) and then 1 layer of WER4-O scattering colloid (Dyesol). Each  $\text{TiO}_2$  layer was sintered 500°C for 30 min prior to immersion in 50 mM solution of  $\text{TiCl}_4:\text{THF}_2$  in DI water at 70°C for 30 min, rinsing and re-sintering at 500°C for 30min. Photo-anodes were dyed by immersion in 0.5mM THF solutions for 18h before rinsing with THF. Counter electrodes were platinized by depositing Pt colloid (Dyesol) on TEC8™ glass pre-drilled with 2 fill holes 2cm apart and sintering at 400°C for 30min. The 2 electrodes were sealed together using Surlyn™ (DuPont) at 120°C and the cavity filled with electrolyte (1-methyl-3-propyl-imidazolium iodide,  $\text{LiI}$ ,  $\text{I}_2$ , benzimidazole and guanidine thiocyanate in acetonitrile). Fill holes were sealed with a glass cover slip and further Surlyn™ at 120°C.

I-V data were measured with a Xe arc lamp solar simulator (ABET) and a Keithley 2400 at 1 Sun calibrated using a certified crystalline Si reference cell (Oriol 91150V). Spectral response was measured at 1 Sun on a QEX10 Quantum Efficiency Measurement System in

DC mode at 10 nm resolution.

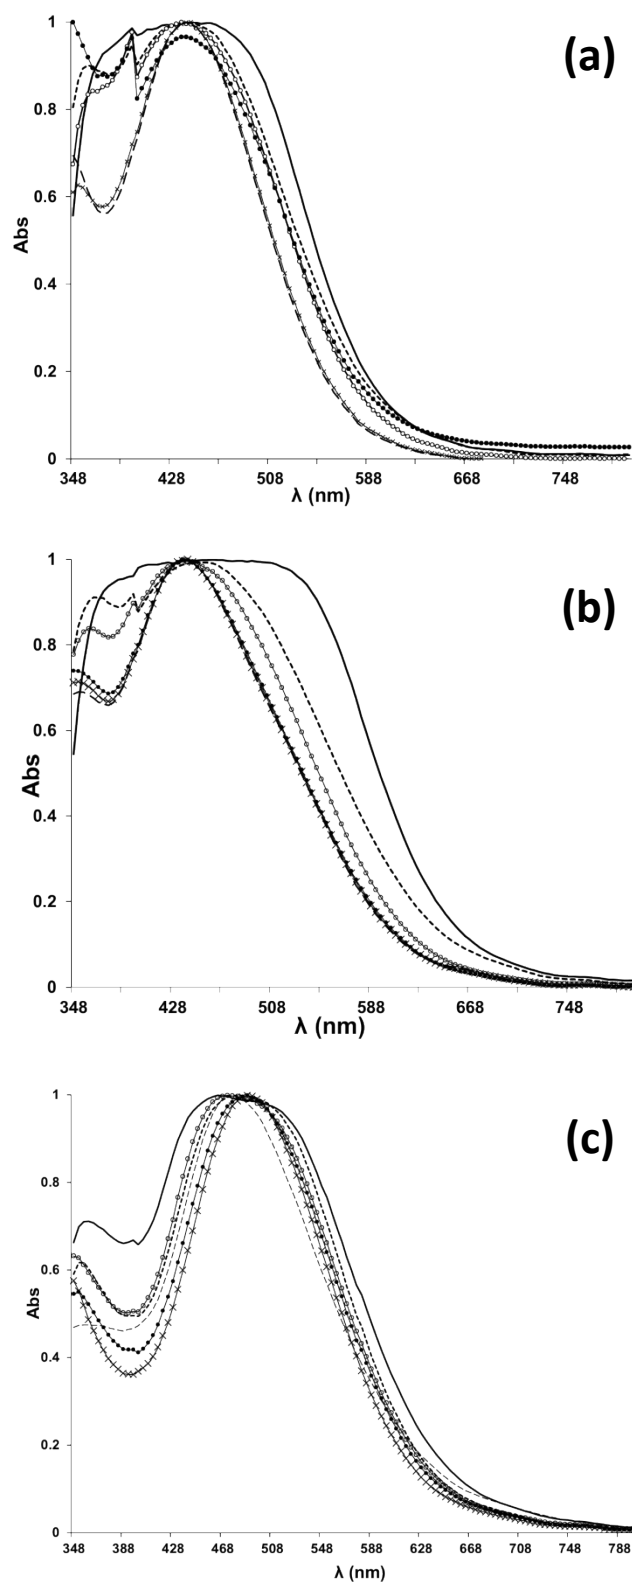

**Fig. S2** Normalised UV-vis spectra of (a) **EDOT-Ph**, (b) **EDOT-Fu** and (c) **EDOT-Th** adsorbed on transparent, mesoporous  $\text{TiO}_2$  films with varying concentrations of CDCA; 0mM (solid line), 1mM (short dashes), 5mM (open circles), 10mM (closed circles), 15mM (black crosses) and 20mM (long dashes).

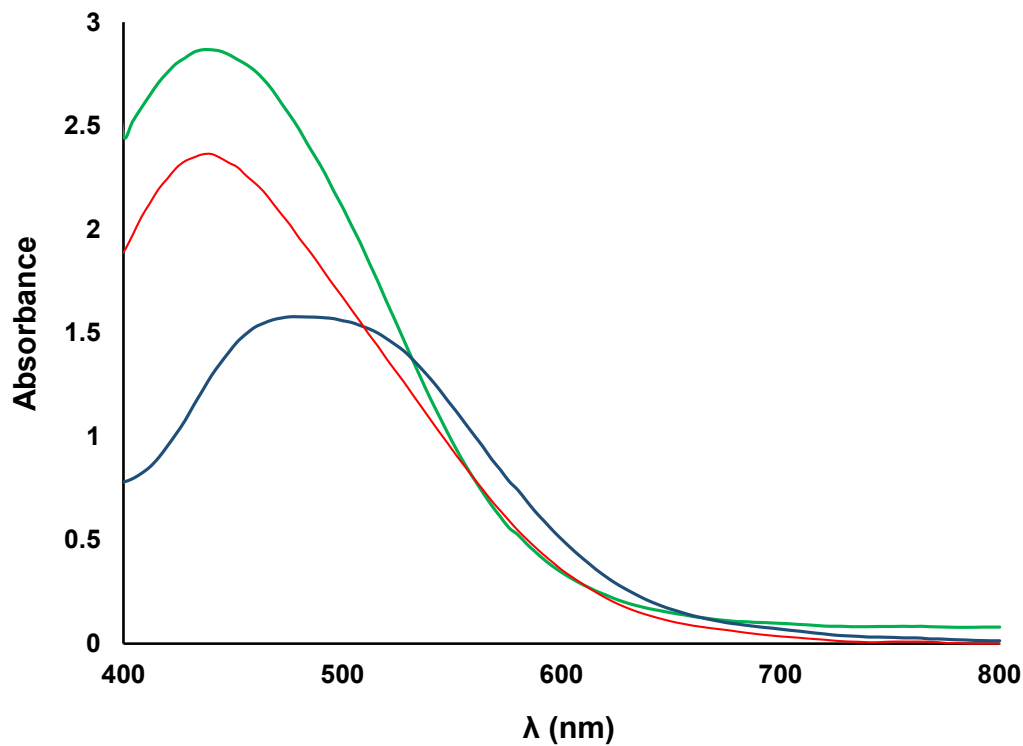

Fig. S2 cont. (d) Raw UV-vis spectral data of **EDOT-Ph** (green), **EDOT-Fu** (red) and **EDOT-Th** (blue) adsorbed on transparent, mesoporous  $\text{TiO}_2$  films.

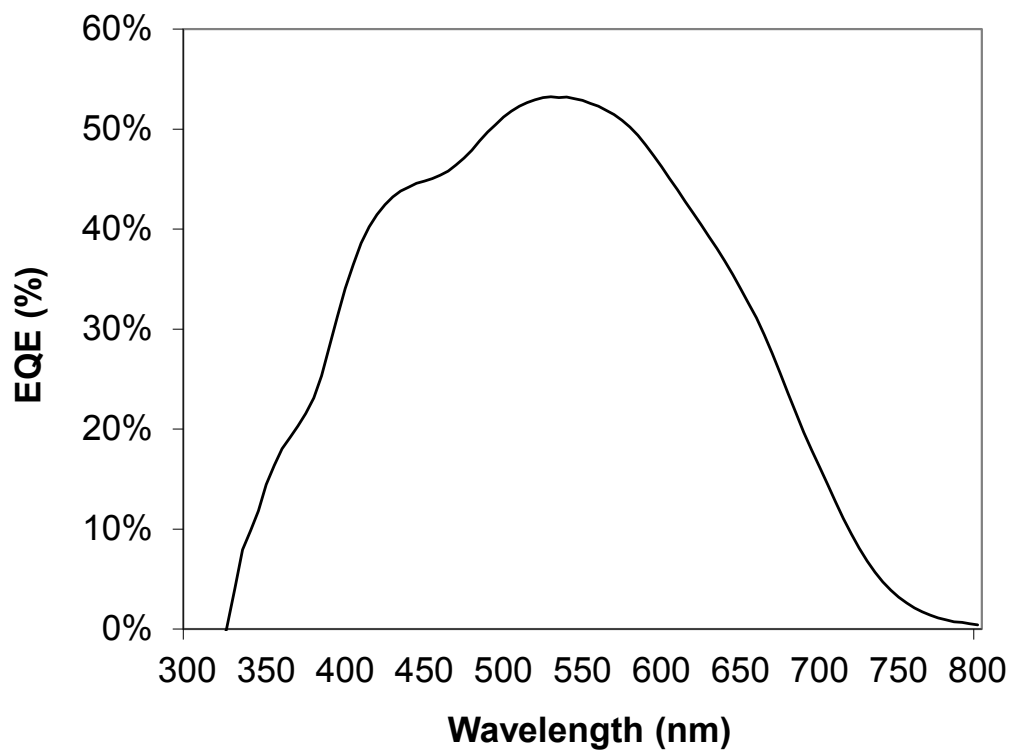

**Fig. S3** EQE of N719 dyed DSSC device.

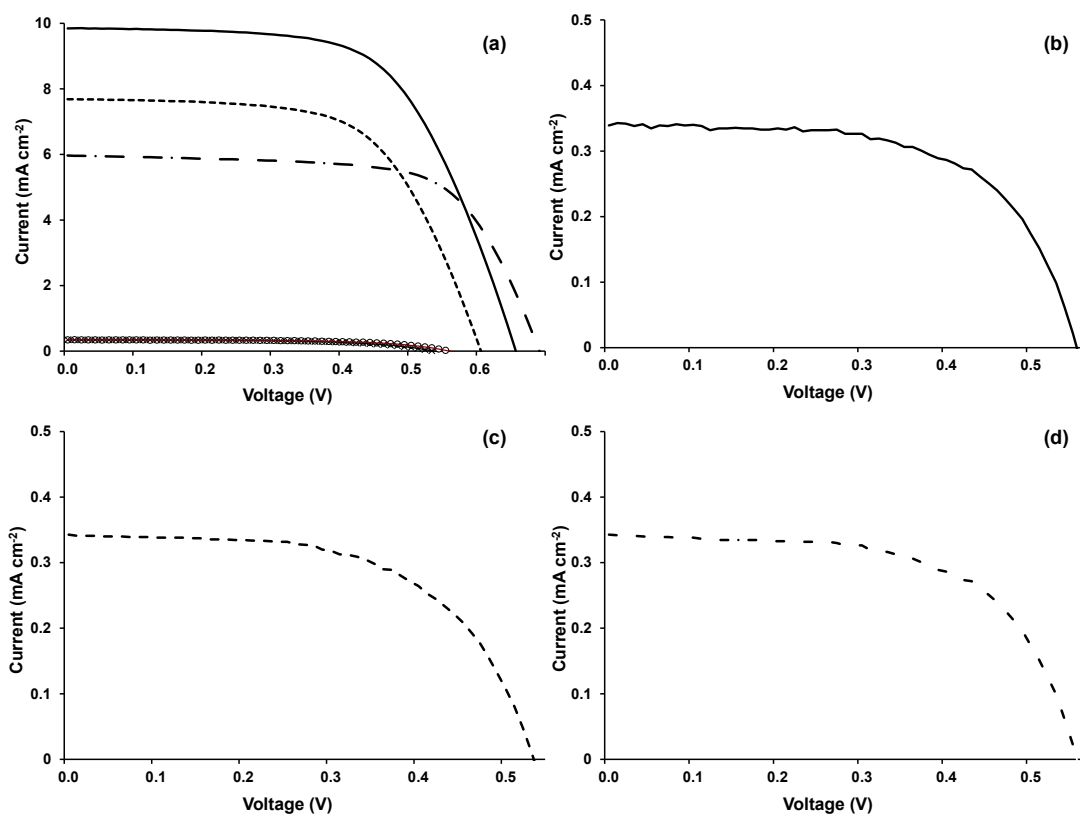

**Fig. S4** (a) I-V data for EDOT dyes under illumination in the dark and replotted IV data for dark currents for (b) EDOT-Ph, (c) EDOT-Fu and (d) EDOT-Th. Key for all data = EDOT-Ph (solid line), (c) EDOT-Fu (dashed line) and (d) EDOT-Th (dot-dashed lines).

#### 4. <sup>1</sup>H NMR spectra.

##### EDOT-Ph:

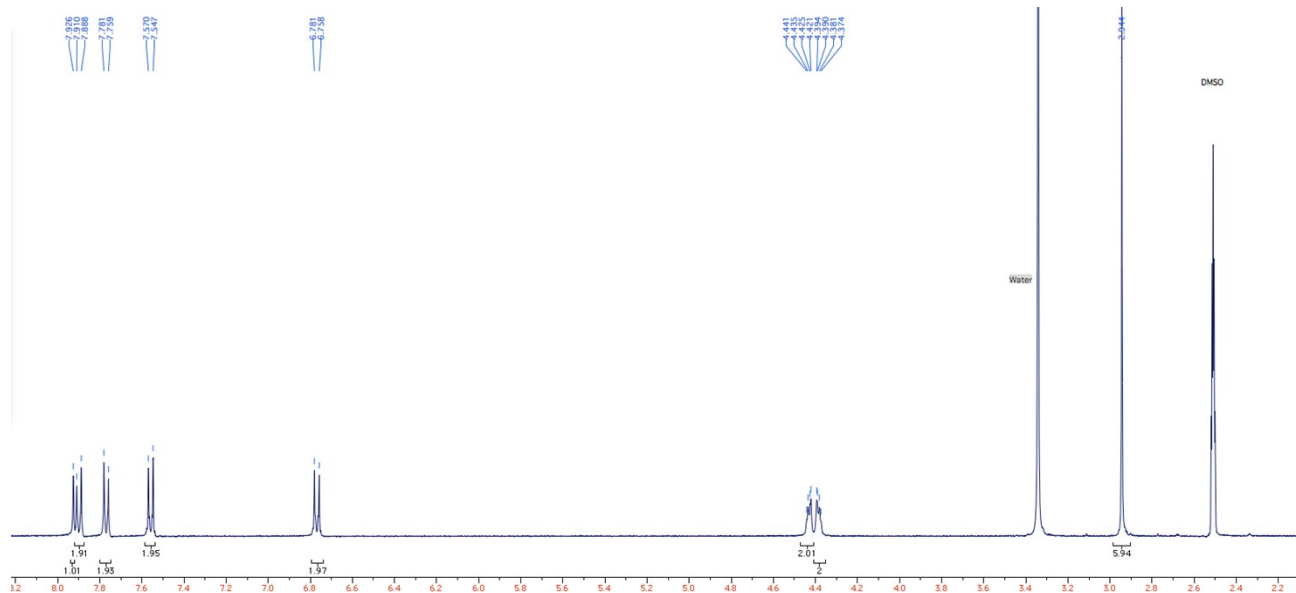

##### EDOT-Fu:

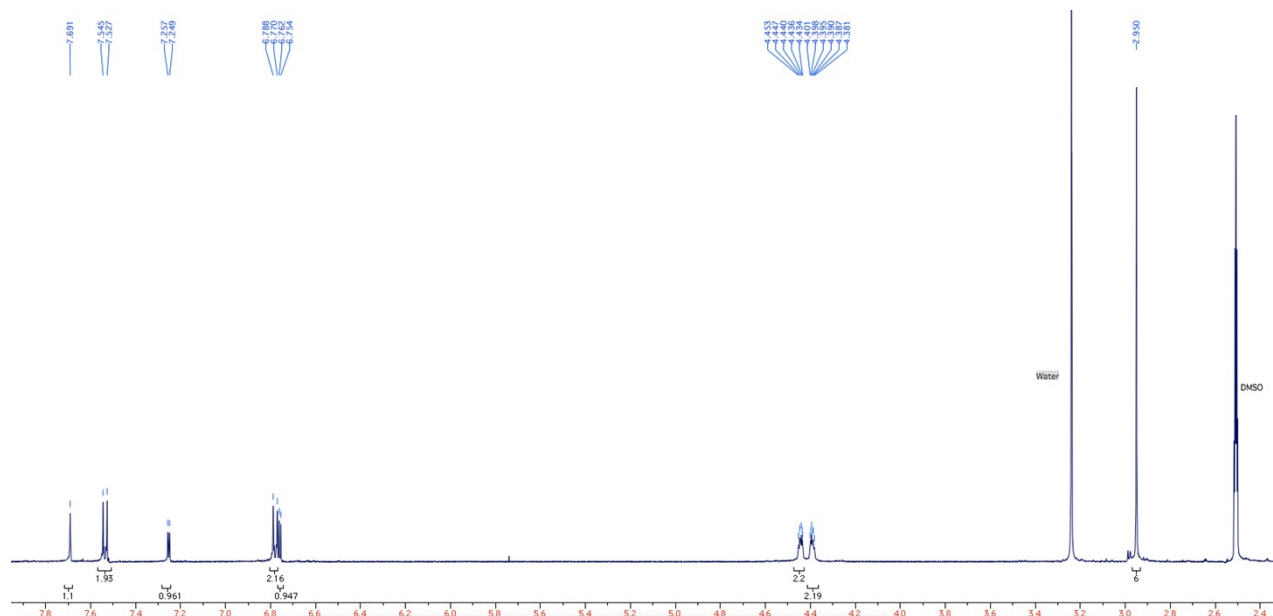

**EDOT-Th:**

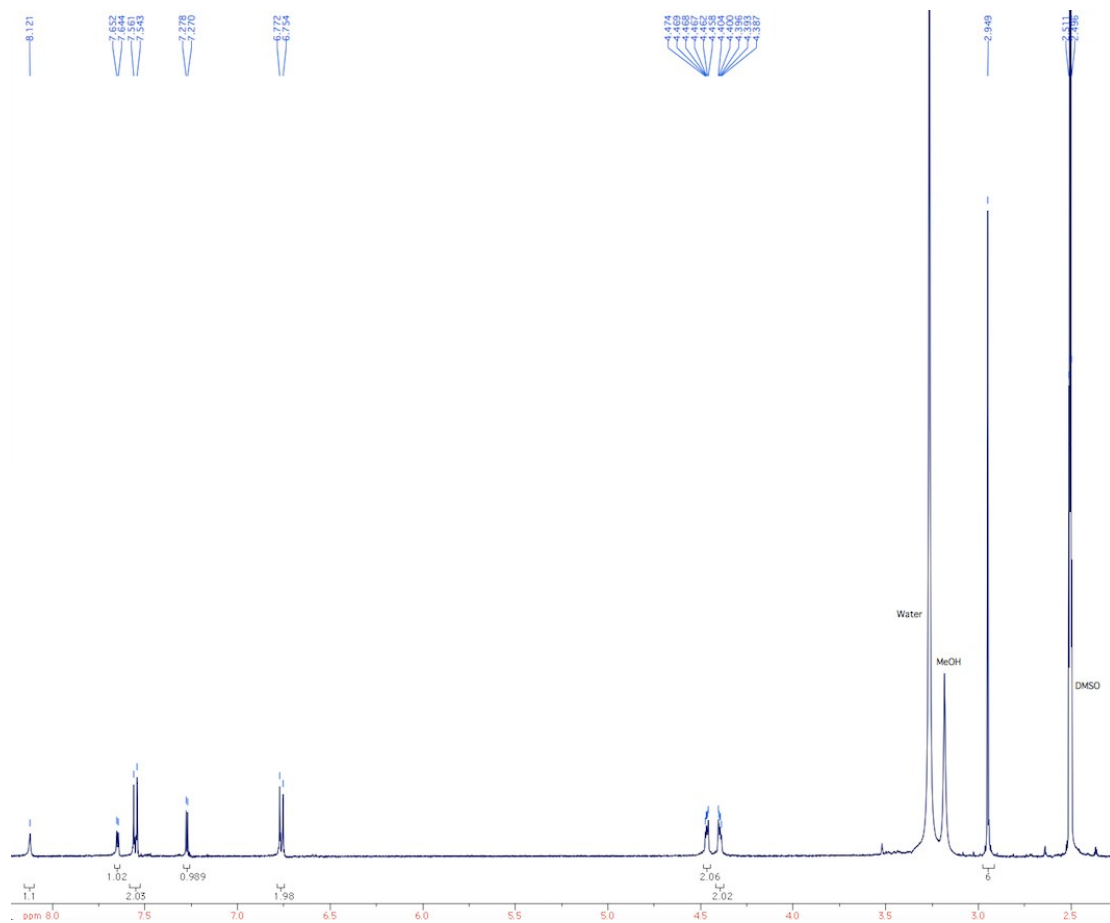

Supplement: c6ta04483b1.pdf [file c6ta04483b1.pdf]
